# Supplementary material for: In Vitro Salivary Protein Adsorption Profile on Titanium and Ceramic Surfaces and the Corresponding Putative Immunological Implications
Source: PubMed Central journal article supplement (PMC7247707; doi:10.3390/ijms21093083), 2020-04-27
Supplement: ijms-21-03083-s001.pdf [file ijms-21-03083-s001.pdf]

Supplementary material

**Table S1.** Acquired salivary proteins and peptides detected on titanium and feldspathic ceramic surfaces

| Accession ID | Protein                             | Gene          | Mol. weight [kDa] | Q-value <sup>a</sup> | Score <sup>b</sup> | Titanium | Ceramic |
|--------------|-------------------------------------|---------------|-------------------|----------------------|--------------------|----------|---------|
| P61604       | 10 kDa heat shock protein           | <i>HSPE1</i>  | 10.932            | 0                    | 38.331             | +        | +       |
| P31946       | 14-3-3 protein beta/alpha           | <i>YWHAB</i>  | 28.082            | 0                    | 27.442             | -        | +       |
| P62258       | 14-3-3 protein epsilon              | <i>YWHAE</i>  | 29.174            | 0                    | 26.999             | +        | +       |
| P31947       | 14-3-3 protein sigma                | <i>SFN</i>    | 27.774            | 0                    | 323.310            | +        | +       |
| P27348       | 14-3-3 protein theta                | <i>YWHAQ</i>  | 27.764            | 0                    | 6.026              | +        | +       |
| P63104       | 14-3-3 protein zeta/delta           | <i>YWHAZ</i>  | 27.745            | 0                    | 323.310            | +        | +       |
| E5RGC7       | 28S ribosomal protein S28           | <i>MRPS28</i> | 11.747            | 0.001                | 2.110              | +        | -       |
| P46783       | 40S ribosomal protein S10           | <i>RPS10</i>  | 18.898            | 0                    | 7.188              | +        | -       |
| P25398       | 40S ribosomal protein S12           | <i>RPS12</i>  | 14.515            | 0                    | 12.302             | +        | +       |
| I3L3P7       | 40S ribosomal protein S15a          | <i>RPS15A</i> | 11.477            | 0                    | 5.457              | +        | -       |
| P62269       | 40S ribosomal protein S18           | <i>RPS18</i>  | 17.718            | 0                    | 44.435             | +        | -       |
| H0YEN5       | 40S ribosomal protein S2            | <i>RPS2</i>   | 21.154            | 0                    | 10.343             | +        | -       |
| H0Y8L7       | 40S ribosomal protein S3a           | <i>RPS3A</i>  | 22.137            | 0.002                | 3.664              | +        | -       |
| P62701       | 40S ribosomal protein S4, X isoform | <i>RPS4X</i>  | 29.597            | 0                    | 32.952             | +        | -       |
| P62753       | 40S ribosomal protein S6            | <i>RPS6</i>   | 28.680            | 0                    | 7.289              | +        | -       |
| P62081       | 40S ribosomal protein S7            | <i>RPS7</i>   | 22.127            | 0                    | 12.799             | +        | -       |
| Q5JR95       | 40S ribosomal protein S8            | <i>RPS8</i>   | 21.879            | 0                    | 21.677             | +        | -       |
| P10809       | 60 kDa heat shock protein           | <i>HSPD1</i>  | 61.054            | 0                    | 184.440            | +        | +       |
| P05386       | 60S acidic ribosomal protein P1     | <i>RPLP1</i>  | 11.514            | 0                    | 25.891             | +        | +       |
| P05387       | 60S acidic ribosomal protein P2     | <i>RPLP2</i>  | 11.665            | 0                    | 35.789             | +        | -       |
| P62906       | 60S ribosomal protein L10a          | <i>RPL10A</i> | 24.831            | 0.001                | 1.912              | +        | -       |
| P30050       | 60S ribosomal protein L12           | <i>RPL12</i>  | 17.818            | 0                    | 36.473             | +        | -       |

| Accession ID | Protein                                                       | Gene            | Mol.<br>weight<br>[kDa] | Q-value <sup>a</sup> | Score <sup>b</sup> | Titanium | Ceramic |
|--------------|---------------------------------------------------------------|-----------------|-------------------------|----------------------|--------------------|----------|---------|
| P26373       | 60S ribosomal protein L13                                     | <i>RPL13</i>    | 24.261                  | 0                    | 9.378              | +        | -       |
| J3QQT2       | 60S ribosomal protein L17                                     | <i>RPL17</i>    | 19.586                  | 0                    | 40.597             | +        | -       |
| P46778       | 60S ribosomal protein L21                                     | <i>RPL21</i>    | 18.565                  | 0                    | 26.934             | +        | -       |
| E9PJD9       | 60S ribosomal protein L27a                                    | <i>RPL27A</i>   | 10.127                  | 0.001                | 2.704              | +        | -       |
| J3KT73       | 60S ribosomal protein L38                                     | <i>RPL38</i>    | 7.5649                  | 0                    | 90.283             | +        | -       |
| Q02878       | 60S ribosomal protein L6                                      | <i>RPL6</i>     | 32.728                  | 0                    | 27.736             | +        | +       |
| E9PKZ0       | 60S ribosomal protein L8                                      | <i>RPL8</i>     | 22.389                  | 0.002                | 3.316              | +        | -       |
| P52209       | 6-phosphogluconate dehydrogenase                              | <i>PGD</i>      | 53.139                  | 0                    | 154.670            | +        | +       |
| P11021       | 78 kDa glucose-regulated protein                              | <i>HSPA5</i>    | 72.332                  | 0                    | 159.160            | +        | +       |
| H0YN26       | Acidic leucine-rich nuclear phosphoprotein 32 family member A | <i>ANP32A</i>   | 19.997                  | 0                    | 9.414              | +        | -       |
| A2A274       | Aconitate hydratase                                           | <i>ACO2</i>     | 87.819                  | 0                    | 73.748             | -        | +       |
| P68133       | Actin, alpha skeletal muscle                                  | <i>ACTA1</i>    | 42.051                  | 0                    | 61.940             | +        | +       |
| P60709       | Actin, cytoplasmic 1                                          | <i>ACTB</i>     | 41.736                  | 0                    | 323.310            | +        | +       |
| P63261       | Actin, cytoplasmic 2                                          | <i>ACTG1</i>    | 41.792                  | 0                    | 149.770            | +        | +       |
| F8VR50       | Actin-related protein 2/3 complex subunit 3                   | <i>ARPC3</i>    | 9.7261                  | 0                    | 5.957              | +        | -       |
| F8WCF6       | Actin-related protein 2/3 complex subunit 4                   | <i>ARPC4</i>    | 21.058                  | 0                    | 6.376              | -        | +       |
| B8ZWD1       | Acyl-CoA-binding protein                                      | <i>DBI</i>      | 11.150                  | 0                    | 49.419             | +        | +       |
| P23526       | Adenosylhomocysteinase                                        | <i>AHCY</i>     | 47.716                  | 0                    | 31.345             | +        | -       |
| F8W1A4       | Adenylate kinase 2                                            | <i>AK2</i>      | 25.630                  | 0                    | 13.275             | +        | -       |
| Q01518       | Adenylyl cyclase-associated protein 1                         | <i>CAP1</i>     | 51.901                  | 0                    | 66.387             | +        | +       |
| Q15847       | Adipogenesis regulatory factor                                | <i>ADIRF</i>    | 7.855                   | 0                    | 28.569             | +        | -       |
| F5H423       | ADP-ribosylation factor 1                                     | <i>ARF1</i>     | 23.346                  | 0.002                | 3.866              | +        | -       |
| C9JMC5       | Aldehyde dehydrogenase, dimeric NADP-preferring               | <i>ALDH3A1</i>  | 41.647                  | 0                    | 43.332             | +        | +       |
| P02763       | Alpha-1-acid glycoprotein 1                                   | <i>ORM1</i>     | 23.511                  | 0                    | 99.424             | +        | +       |
| P01011       | Alpha-1-antichymotrypsin                                      | <i>SERPINA3</i> | 47.650                  | 0.002                | 4.147              | +        | -       |
| P01009       | Alpha-1-antitrypsin                                           | <i>SERPINA1</i> | 46.736                  | 0                    | 323.310            | +        | +       |

| Accession ID | Protein                               | Gene            | Mol.<br>weight<br>[kDa] | Q-value <sup>a</sup> | Score <sup>b</sup> | Titanium | Ceramic |
|--------------|---------------------------------------|-----------------|-------------------------|----------------------|--------------------|----------|---------|
| P04217       | Alpha-1B-glycoprotein                 | <i>A1BG</i>     | 54.253                  | 0                    | 20.495             | +        | -       |
| C9JV77       | Alpha-2-HS-glycoprotein               | <i>AHSG</i>     | 39.411                  | 0                    | 323.310            | +        | +       |
| P01023       | Alpha-2-macroglobulin                 | <i>A2M</i>      | 163.290                 | 0                    | 323.310            | +        | +       |
| A8K2U0       | Alpha-2-macroglobulin-like protein 1  | <i>A2ML1</i>    | 161.100                 | 0                    | 139.270            | +        | +       |
| O43707       | Alpha-actinin-4                       | <i>ACTN4</i>    | 104.850                 | 0                    | 45.992             | +        | +       |
| P04745       | Alpha-amylase 1                       | <i>AMY1A</i>    | 57.767                  | 0                    | 323.310            | +        | +       |
| P06733       | Alpha-enolase                         | <i>ENO1</i>     | 47.168                  | 0                    | 323.310            | +        | +       |
| H7C0V9       | Amyloid beta A4 protein               | <i>APP</i>      | 54.981                  | 0                    | 11.414             | +        | +       |
| P03950       | Angiogenin                            | <i>ANG</i>      | 16.550                  | 0                    | 14.935             | +        | +       |
| P04083       | Annexin A1                            | <i>ANXA1</i>    | 38.714                  | 0                    | 274.520            | +        | +       |
| P07355       | Annexin A2                            | <i>ANXA2</i>    | 38.604                  | 0                    | 204.250            | +        | +       |
| P03973       | Antileukoproteinase                   | <i>SLPI</i>     | 14.326                  | 0                    | 323.310            | +        | +       |
| P01008       | Antithrombin-III                      | <i>SERPINC1</i> | 52.602                  | 0                    | 9.259              | +        | -       |
| P02647       | Apolipoprotein A-I                    | <i>APOA1</i>    | 30.777                  | 0                    | 323.310            | +        | +       |
| V9GYG9       | Apolipoprotein A-II                   | <i>APOA2</i>    | 10.649                  | 0                    | 52.050             | +        | +       |
| P06727       | Apolipoprotein A-IV                   | <i>APOA4</i>    | 45.398                  | 0                    | 172.230            | +        | +       |
| P04114       | Apolipoprotein B-100                  | <i>APOB</i>     | 489.830                 | 0                    | 16.214             | -        | +       |
| P54253       | Ataxin-1                              | <i>ATXN1</i>    | 86.922                  | 0.001                | 2.986              | -        | +       |
| P25705       | ATP synthase subunit alpha            | <i>ATP5A1</i>   | 59.750                  | 0                    | 123.550            | -        | +       |
| P06576       | ATP synthase subunit beta             | <i>ATP5B</i>    | 56.559                  | 0                    | 223.450            | +        | -       |
| O15523       | ATP-dependent RNA helicase DDX3Y      | <i>DDX3Y</i>    | 73.153                  | 0                    | 8.269              | +        | -       |
| G3V1R1       | Basic salivary proline-rich protein 1 | <i>PRB1</i>     | 17.672                  | 0                    | 6.693              | +        | +       |
| P02812       | Basic salivary proline-rich protein 2 | <i>PRB2</i>     | 40.799                  | 0                    | 171.050            | +        | +       |
| F5H7C1       | Basic salivary proline-rich protein 3 | <i>PRB3</i>     | 35.122                  | 0                    | 17.983             | +        | +       |
| E7EXA8       | Basic salivary proline-rich protein 4 | <i>PRB4</i>     | 18.011                  | 0                    | 24.669             | +        | +       |
| P02749       | Beta-2-glycoprotein 1                 | <i>APOH</i>     | 38.298                  | 0                    | 160.400            | +        | +       |

| Accession ID | Protein                                   | Gene           | Mol. weight [kDa] | Q-value <sup>a</sup> | Score <sup>b</sup> | Titanium | Ceramic |
|--------------|-------------------------------------------|----------------|-------------------|----------------------|--------------------|----------|---------|
| H0YL18       | Beta-2-microglobulin                      | <i>B2M</i>     | 13.972            | 0                    | 122.650            | +        | +       |
| P07686       | Beta-hexosaminidase subunit beta          | <i>HEXB</i>    | 63.111            | 0                    | 6.542              | -        | +       |
| Q9NP55       | BPI fold-containing family A member 1     | <i>BPIFA1</i>  | 26.712            | 0                    | 6.238              | +        | -       |
| Q96DR5       | BPI fold-containing family A member 2     | <i>BPIFA2</i>  | 27.011            | 0                    | 227.990            | +        | +       |
| Q8TDL5       | BPI fold-containing family B member 1     | <i>BPIFB1</i>  | 52.441            | 0                    | 154.920            | +        | +       |
| Q8N4F0       | BPI fold-containing family B member 2     | <i>BPIFB2</i>  | 49.172            | 0                    | 295.060            | +        | +       |
| P80723       | Brain acid soluble protein 1              | <i>BASP1</i>   | 22.693            | 0                    | 6.496              | +        | +       |
| H0Y7A7       | Calmodulin                                | <i>CALM1</i>   | 20.762            | 0                    | 141.550            | +        | +       |
| P27482       | Calmodulin-like protein 3                 | <i>CALML3</i>  | 16.891            | 0                    | 240.510            | +        | +       |
| Q9NZT1       | Calmodulin-like protein 5                 | <i>CALML5</i>  | 15.892            | 0                    | 18.248             | +        | +       |
| P27797       | Calreticulin                              | <i>CALR</i>    | 48.141            | 0                    | 144.050            | +        | +       |
| O43852       | Calumenin                                 | <i>CALU</i>    | 37.106            | 0                    | 7.479              | +        | +       |
| E5RH81       | Carbonic anhydrase 1                      | <i>CA1</i>     | 19.236            | 0                    | 12.570             | +        | -       |
| P23280       | Carbonic anhydrase 6                      | <i>CA6</i>     | 35.366            | 0                    | 323.310            | +        | +       |
| P07858       | Cathepsin B                               | <i>CTSB</i>    | 37.821            | 0                    | 114.650            | +        | +       |
| P07339       | Cathepsin D                               | <i>CTSD</i>    | 44.552            | 0                    | 49.403             | +        | +       |
| Q5T8F0       | Cathepsin L1                              | <i>CTSL</i>    | 25.500            | 0.006                | 1.194              | +        | -       |
| P60953       | Cell division control protein 42 homolog  | <i>CDC42</i>   | 21.258            | 0                    | 5.398              | +        | -       |
| P29373       | Cellular retinoic acid-binding protein 2  | <i>CRABP2</i>  | 15.693            | 0                    | 7.859              | +        | -       |
| P00450       | Ceruloplasmin                             | <i>CP</i>      | 122.200           | 0                    | 77.473             | +        | +       |
| P36222       | Chitinase-3-like protein 1                | <i>CHI3L1</i>  | 42.625            | 0.001                | 2.668              | -        | +       |
| P10909       | Clusterin                                 | <i>CLU</i>     | 52.494            | 0                    | 138.440            | +        | +       |
| P00748       | Coagulation factor XII                    | <i>F12</i>     | 67.791            | 0                    | 74.668             | +        | +       |
| P23528       | Cofilin-1                                 | <i>CFL1</i>    | 18.502            | 0                    | 208.150            | +        | +       |
| Q96CT7       | Coiled-coil domain-containing protein 124 | <i>CCDC124</i> | 25.835            | 0.005                | 1.317              | +        | -       |
| P02452       | Collagen alpha-1(I) chain                 | <i>COL1A1</i>  | 138.940           | 0                    | 84.482             | +        | +       |

| Accession ID | Protein                                                    | Gene          | Mol.<br>weight<br>[kDa] | Q-value <sup>a</sup> | Score <sup>b</sup> | Titanium | Ceramic |
|--------------|------------------------------------------------------------|---------------|-------------------------|----------------------|--------------------|----------|---------|
| P08123       | Collagen alpha-2(I) chain                                  | <i>COL1A2</i> | 129.150                 | 0                    | 119.690            | +        | +       |
| P01024       | Complement C3                                              | <i>C3</i>     | 187.150                 | 0                    | 323.310            | +        | +       |
| P0COL4       | Complement C4-B                                            | <i>C4B</i>    | 192.780                 | 0                    | 287.410            | +        | +       |
| Q07021       | Complement component 1 Q subcomponent-binding protein      | <i>C1QBP</i>  | 31.362                  | 0                    | 50.237             | +        | -       |
| B4E1Z4       | Complement factor B                                        | <i>CFB</i>    | 140.940                 | 0                    | 66.899             | +        | +       |
| P08603       | Complement factor H                                        | <i>CFH</i>    | 139.090                 | 0                    | 253.340            | +        | +       |
| P35321       | Cornifin-A                                                 | <i>SPRR1A</i> | 9.877                   | 0                    | 107.850            | +        | +       |
| P22528       | Cornifin-B                                                 | <i>SPRR1B</i> | 9.888                   | 0                    | 158.830            | +        | +       |
| Q9UBG3       | Cornulin                                                   | <i>CRNN</i>   | 53.533                  | 0                    | 323.310            | +        | +       |
| P31146       | Coronin-1A;Coronin                                         | <i>CORO1A</i> | 51.026                  | 0                    | 90.289             | +        | +       |
| P04080       | Cystatin-B                                                 | <i>CSTB</i>   | 11.139                  | 0                    | 134.160            | +        | +       |
| P01034       | Cystatin-C                                                 | <i>CST3</i>   | 15.799                  | 0                    | 226.520            | +        | +       |
| P28325       | Cystatin-D                                                 | <i>CST5</i>   | 16.080                  | 0                    | 323.310            | +        | +       |
| P01036       | Cystatin-S                                                 | <i>CST4</i>   | 16.214                  | 0                    | 323.310            | +        | +       |
| P09228       | Cystatin-SA                                                | <i>CST2</i>   | 16.445                  | 0                    | 289.390            | +        | +       |
| P01037       | Cystatin-SN                                                | <i>CST1</i>   | 16.387                  | 0                    | 323.310            | +        | +       |
| J3KPA1       | Cysteine-rich secretory protein 3                          | <i>CRISP3</i> | 30.975                  | 0                    | 173.210            | +        | +       |
| P32320       | Cytidine deaminase                                         | <i>CDA</i>    | 16.185                  | 0                    | 20.168             | +        | +       |
| Q9UGM3       | Deleted in malignant brain tumors 1 protein                | <i>DMBT1</i>  | 260.730                 | 0                    | 323.310            | +        | +       |
| Q02487       | Desmocollin-2                                              | <i>DSC2</i>   | 99.961                  | 0                    | 155.040            | +        | +       |
| Q02413       | Desmoglein-1                                               | <i>DSG1</i>   | 113.750                 | 0.002                | 3.501              | +        | +       |
| P32926       | Desmoglein-3                                               | <i>DSG3</i>   | 107.530                 | 0                    | 63.865             | +        | +       |
| F6RFD5       | Destrin                                                    | <i>DSTN</i>   | 15.397                  | 0.002                | 3.231              | +        | -       |
| O60216       | Double-strand-break repair protein rad21                   | <i>RAD21</i>  | 71.689                  | 0.003                | 1.707              | +        | -       |
| Q76N89       | E3 ubiquitin-protein ligase HECW1                          | <i>HECW1</i>  | 179.550                 | 0.003                | 1.704              | +        | +       |
| Q12805       | EGF-containing fibulin-like extracellular matrix protein 1 | <i>EFEMP1</i> | 54.640                  | 0                    | 39.828             | +        | +       |

| Accession ID | Protein                                    | Gene            | Mol. weight [kDa] | Q-value <sup>a</sup> | Score <sup>b</sup> | Titanium | Ceramic |
|--------------|--------------------------------------------|-----------------|-------------------|----------------------|--------------------|----------|---------|
| P19957       | Elafin                                     | <i>PI3</i>      | 12.269            | 0                    | 8.603              | +        | +       |
| Q5VTE0       | Elongation factor 1-alpha 1                | <i>EEF1A1</i>   | 50.184            | 0                    | 92.366             | +        | +       |
| E9PNW6       | Elongation factor 1-delta                  | <i>EEF1D</i>    | 4.227             | 0.001                | 3.029              | +        | -       |
| P26641       | Elongation factor 1-gamma                  | <i>EEF1G</i>    | 50.118            | 0                    | 26.082             | +        | +       |
| P13639       | Elongation factor 2                        | <i>EEF2</i>     | 95.337            | 0                    | 64.550             | +        | +       |
| P14625       | Endoplasmin                                | <i>HSP90B1</i>  | 92.468            | 0                    | 28.754             | +        | -       |
| Q5HYB6       | Epididymis luminal protein 189             | <i>TPM3</i>     | 27.175            | 0                    | 51.025             | +        | +       |
| Q16610       | Extracellular matrix protein 1             | <i>ECM1</i>     | 60.673            | 0.002                | 4.097              | +        | +       |
| E7EQR4       | Ezrin                                      | <i>EZR</i>      | 69.371            | 0                    | 225.510            | +        | +       |
| Q01469       | Fatty acid-binding protein                 | <i>FABP5</i>    | 15.164            | 0                    | 323.310            | +        | +       |
| P02671       | Fibrinogen alpha chain                     | <i>FGA</i>      | 94.972            | 0                    | 323.310            | +        | +       |
| P02675       | Fibrinogen beta chain                      | <i>FGB</i>      | 55.928            | 0                    | 323.310            | +        | +       |
| C9JEU5       | Fibrinogen gamma chain                     | <i>FGG</i>      | 50.322            | 0                    | 228.070            | +        | +       |
| P02751       | Fibronectin                                | <i>FN1</i>      | 262.620           | 0                    | 105.410            | +        | +       |
| P23142       | Fibulin-1                                  | <i>FBLN1</i>    | 77.213            | 0.001                | 3.110              | +        | -       |
| Q5HY54       | Filamin-A                                  | <i>FLNA</i>     | 276.550           | 0                    | 10.279             | +        | -       |
| P15328       | Folate receptor alpha                      | <i>FOLR1</i>    | 29.819            | 0                    | 171.500            | +        | +       |
| Q8NFU4       | Follicular dendritic cell secreted peptide | <i>FDCSP</i>    | 9.700             | 0.001                | 2.101              | +        | +       |
| P04075       | Fructose-bisphosphate aldolase A           | <i>ALDOA</i>    | 39.420            | 0                    | 200.800            | +        | +       |
| P09972       | Fructose-bisphosphate aldolase C           | <i>ALDOC</i>    | 39.455            | 0                    | 19.610             | +        | +       |
| P09382       | Galectin-1                                 | <i>LGALS1</i>   | 14.716            | 0                    | 32.436             | +        | -       |
| P17931       | Galectin-3                                 | <i>LGALS3</i>   | 26.152            | 0                    | 6.677              | +        | -       |
| Q08380       | Galectin-3-binding protein                 | <i>LGALS3BP</i> | 65.330            | 0                    | 205.070            | +        | +       |
| P06744       | Glucose-6-phosphate isomerase              | <i>GPI</i>      | 64.824            | 0                    | 57.487             | +        | +       |
| P14314       | Glucosidase 2 subunit beta                 | <i>PRKCSH</i>   | 60.192            | 0                    | 84.794             | +        | +       |
| P09211       | Glutathione S-transferase P                | <i>GSTP1</i>    | 23.356            | 0                    | 323.310            | +        | +       |

| Accession ID | Protein                                                            | Gene            | Mol.<br>weight<br>[kDa] | Q-value <sup>a</sup> | Score <sup>b</sup> | Titanium | Ceramic |
|--------------|--------------------------------------------------------------------|-----------------|-------------------------|----------------------|--------------------|----------|---------|
| P04406       | Glyceraldehyde-3-phosphate dehydrogenase                           | <i>GAPDH</i>    | 36.053                  | 0                    | 323.310            | +        | +       |
| Q92896       | Golgi apparatus protein 1                                          | <i>GLG1</i>     | 134.550                 | 0                    | 46.042             | +        | +       |
| Q8NBJ4       | Golgi membrane protein 1                                           | <i>GOLM1</i>    | 45.333                  | 0                    | 6.801              | +        | +       |
| P28799       | Granulins                                                          | <i>GRN</i>      | 63.544                  | 0                    | 145.560            | +        | +       |
| Q9HAV7       | GrpE protein homolog 1                                             | <i>GRPEL1</i>   | 24.279                  | 0.001                | 2.876              | +        | -       |
| B5MDF5       | GTP-binding nuclear protein Ran                                    | <i>RAN</i>      | 26.224                  | 0                    | 13.673             | +        | +       |
| P00738       | Haptoglobin                                                        | <i>HP</i>       | 45.205                  | 0                    | 297.690            | +        | +       |
| P08107       | Heat shock 70 kDa protein 1A/1B                                    | <i>HSPA1A</i>   | 70.051                  | 0                    | 105.400            | +        | +       |
| P17066       | Heat shock 70 kDa protein 6                                        | <i>HSPA6</i>    | 71.027                  | 0                    | 10.188             | +        | +       |
| E9PKE3       | Heat shock cognate 71 kDa protein                                  | <i>HSPA8</i>    | 68.805                  | 0                    | 105.970            | +        | +       |
| O75506       | Heat shock factor-binding protein 1                                | <i>HSBP1</i>    | 8.5435                  | 0                    | 10.867             | -        | +       |
| P04792       | Heat shock protein beta-1                                          | <i>HSPB1</i>    | 22.782                  | 0                    | 11.232             | +        | +       |
| P07900       | Heat shock protein HSP 90-alpha                                    | <i>HSP90AA1</i> | 84.659                  | 0                    | 186.580            | +        | +       |
| P08238       | Heat shock protein HSP 90-beta                                     | <i>HSP90AB1</i> | 83.263                  | 0                    | 161.300            | +        | +       |
| Q8NDA2       | Hemicentin-2                                                       | <i>HMCN2</i>    | 62.860                  | 0.005                | 1.290              | +        | +       |
| P69905       | Hemoglobin subunit alpha                                           | <i>HBA1</i>     | 15.257                  | 0                    | 323.310            | +        | +       |
| P68871       | Hemoglobin subunit beta                                            | <i>HBB</i>      | 15.998                  | 0                    | 323.310            | +        | +       |
| P02042       | Hemoglobin subunit delta                                           | <i>HBD</i>      | 16.055                  | 0                    | 35.870             | +        | +       |
| P02790       | Hemopexin                                                          | <i>HPX</i>      | 51.676                  | 0                    | 215.130            | +        | +       |
| P51858       | Hepatoma-derived growth factor                                     | <i>HDGF</i>     | 26.788                  | 0                    | 157.130            | +        | +       |
| D6R9P3       | Heterogeneous nuclear ribonucleoprotein A/B                        | <i>HNRNPAB</i>  | 30.302                  | 0                    | 15.992             | +        | -       |
| D6RD83       | Heterogeneous nuclear ribonucleoprotein D0                         | <i>HNRNPD</i>   | 9.9407                  | 0.004                | 1.516              | +        | -       |
| Q5T6W5       | Heterogeneous nuclear ribonucleoprotein K                          | <i>HNRNPK</i>   | 47.557                  | 0                    | 29.681             | +        | -       |
| G3V576       | Heterogeneous nuclear ribonucleoproteins C1/C2                     | <i>HNRNPC</i>   | 25.256                  | 0                    | 24.166             | +        | +       |
| P05204       | High mobility group nucleosome-binding domain-containing protein 3 | <i>HMGN3</i>    | 9.393                   | 0.005                | 1.433              | +        | +       |

| Accession ID | Protein                         | Gene              | Mol.<br>weight<br>[kDa] | Q-value <sup>a</sup> | Score <sup>b</sup> | Titanium | Ceramic |
|--------------|---------------------------------|-------------------|-------------------------|----------------------|--------------------|----------|---------|
| P09429       | High mobility group protein B1  | <i>HMGB1</i>      | 24.893                  | 0                    | 60.708             | +        | +       |
| P26583       | High mobility group protein B2  | <i>HMGB2</i>      | 24.033                  | 0                    | 93.792             | +        | +       |
| P15515       | Histatin-1;His1-(31-57)-peptide | <i>HTN1</i>       | 6.963                   | 0                    | 191.070            | +        | +       |
| P04196       | Histidine-rich glycoprotein     | <i>HRG</i>        | 59.578                  | 0                    | 194.230            | +        | +       |
| P16403       | Histone H1.2                    | <i>HIST1H1C</i>   | 21.364                  | 0                    | 12.666             | +        | -       |
| P16401       | Histone H1.5                    | <i>HIST1H1B</i>   | 22.580                  | 0.002                | 3.647              | +        | -       |
| Q16777       | Histone H2A type 2-C            | <i>HIST2H2AC</i>  | 13.988                  | 0                    | 102.700            | +        | +       |
| Q71UI9       | Histone H2A.V                   | <i>H2AFV</i>      | 13.509                  | 0                    | 71.539             | +        | -       |
| U3KQK0       | Histone H2B type 1-K            | <i>HIST1H2BK</i>  | 18.804                  | 0                    | 50.412             | +        | +       |
| Q5TEC6       | Histone H3                      | <i>HIST2H3PS2</i> | 15.430                  | 0                    | 7.789              | +        | -       |
| Q71DI3       | Histone H3.2                    | <i>HIST2H3A</i>   | 15.388                  | 0                    | 21.176             | +        | +       |
| P62805       | Histone H4                      | <i>HIST1H4A</i>   | 11.367                  | 0                    | 258.180            | +        | +       |
| H7C3I1       | Hsc70-interacting protein       | <i>ST13</i>       | 16.219                  | 0.002                | 4.758              | +        | +       |
| P01876       | Ig alpha-1 chain C region       | <i>IGHA1</i>      | 37.654                  | 0                    | 323.310            | +        | +       |
| A0A075B6N7   | Ig alpha-2 chain C region       | <i>IGHA2</i>      | 36.591                  | 0                    | 193.910            | +        | +       |
| P01877       | Ig alpha-2 chain C region       | <i>IGHA2</i>      | 36.526                  | 0                    | 42.274             | +        | +       |
| A0A087WV47   | Ig gamma-1 chain C region       | <i>IGHG1</i>      | 51.153                  | 0                    | 323.310            | +        | +       |
| A0A087X079   | Ig gamma-1 chain C region       | <i>IGHG1</i>      | 51.912                  | 0.001                | 1.868              | -        | +       |
| A0A087WYC5   | Ig gamma-1 chain C region       | <i>IGHG1</i>      | 52.426                  | 0                    | 4.955              | +        | +       |
| P01859       | Ig gamma-2 chain C region       | <i>IGHG2</i>      | 35.900                  | 0                    | 139.770            | +        | +       |
| A0A087WXL8   | Ig gamma-3 chain C region       | <i>IGHG3</i>      | 56.889                  | 0                    | 174.090            | +        | +       |
| P01861       | Ig gamma-4 chain C region       | <i>IGHG4</i>      | 35.940                  | 0                    | 85.277             | +        | +       |
| P01766       | Ig heavy chain V-III region BRO | <i>IGHV3-13</i>   | 13.227                  | 0                    | 112.740            | +        | +       |
| P01765       | Ig heavy chain V-III region TIL | <i>IGHV3-23</i>   | 11.612                  | 0                    | 118.390            | +        | +       |
| P01598       | Ig kappa chain V-I region EU    | <i>IGKV1-5</i>    | 11.788                  | 0                    | 81.106             | +        | +       |
| A0A087X0N5   | Ig kappa chain V-I region WAT   | <i>IGKVID-33</i>  | 10.494                  | 0                    | 94.219             | +        | +       |



| Accession ID | Protein                                                 | Gene                | Mol.<br>weight<br>[kDa] | Q-value <sup>a</sup> | Score <sup>b</sup> | Titanium | Ceramic |
|--------------|---------------------------------------------------------|---------------------|-------------------------|----------------------|--------------------|----------|---------|
| P01611       | Ig kappa chain V-I region Wes                           | <i>IGKV1D-12</i>    | 11.608                  | 0                    | 5.528              | +        | +       |
| P06310       | Ig kappa chain V-II region Cum                          | <i>IGKV2D-29</i>    | 11.192                  | 0                    | 14.854             | +        | +       |
| P01621       | Ig kappa chain V-III region NG9                         | <i>IGKV3-20</i>     | 10.729                  | 0.003                | 1.535              | +        | +       |
| P01623       | Ig kappa chain V-III region WOL                         | <i>IGKV3-20</i>     | 11.746                  | 0                    | 92.691             | +        | +       |
| P01625       | Ig kappa chain V-IV region Len                          | <i>IGKV4-1</i>      | 12.640                  | 0                    | 115.510            | +        | +       |
| P01702       | Ig lambda chain V-I region BL2                          | <i>IGLV1-51</i>     | 12.619                  | 0.005                | 1.414              | +        | +       |
| P04208       | Ig lambda chain V-I region WAH                          | <i>IGLV1-47</i>     | 12.283                  | 0                    | 5.437              | +        | +       |
| P80748       | Ig lambda chain V-III region LOI                        | <i>IGLV3-9</i>      | 11.935                  | 0                    | 83.806             | +        | +       |
| P01714       | Ig lambda chain V-III region SH                         | <i>IGLV3-19</i>     | 11.392                  | 0                    | 38.193             | +        | +       |
| P01717       | Ig lambda chain V-IV region Hil                         | <i>IGLV3-25</i>     | 11.517                  | 0                    | 49.877             | +        | +       |
| P0CG06       | Ig lambda-2 chain C regions/Ig lambda-3 chain C regions | <i>IGLC2/IGLC3</i>  | 11.208                  | 0                    | 228.480            | +        | +       |
| A0A087X2C0   | Ig mu chain C region                                    | <i>IGHM</i>         | 64.106                  | 0                    | 323.310            | +        | +       |
| A0A087WYJ9   | Ig mu heavy chain disease protein                       | <i>IGHM</i>         | 65.700                  | 0.001                | 2.960              | +        | +       |
| Q9Y6R7       | IgGFc-binding protein                                   | <i>FCGBP</i>        | 445.210                 | 0                    | 65.358             | +        | +       |
| Q9GZP8       | Immortalization up-regulated protein                    | <i>IMUP</i>         | 10.897                  | 0.001                | 2.773              | +        | +       |
| P01591       | Immunoglobulin J chain                                  | <i>IGJ</i>          | 18.098                  | 0                    | 77.552             | +        | +       |
| P0CG04       | Immunoglobulin lambda-like polypeptide 5                | <i>IGLL5, IGLC1</i> | 24.683                  | 0                    | 17.173             | +        | +       |
| Q16270       | Insulin-like growth factor-binding protein 7            | <i>IGFBP7</i>       | 29.130                  | 0.001                | 2.873              | +        | +       |
| P19827       | Inter-alpha-trypsin inhibitor heavy chain H1            | <i>ITIH1</i>        | 101.390                 | 0                    | 7.165              | +        | -       |
| Q5T985       | Inter-alpha-trypsin inhibitor heavy chain H2            | <i>ITIH2</i>        | 105.210                 | 0                    | 120.940            | +        | +       |
| B7ZKJ8       | Inter-alpha-trypsin inhibitor heavy chain H4            | <i>ITIH4</i>        | 103.880                 | 0.002                | 4.067              | +        | -       |
| P18510       | Interleukin-1 receptor antagonist protein               | <i>IL1RN</i>        | 20.055                  | 0                    | 50.089             | +        | +       |
| Q9UHA7       | Interleukin-36 alpha                                    | <i>IL36A</i>        | 17.684                  | 0.002                | 4.471              | +        | -       |
| P07476       | Involucrin                                              | <i>IVL</i>          | 68.478                  | 0                    | 12.321             | +        | -       |
| P06870       | Kallikrein-1                                            | <i>KLK1</i>         | 28.889                  | 0                    | 96.828             | +        | +       |
| J3KNA1       | Kinesin heavy chain isoform 5C                          | <i>KIF5C</i>        | 107.250                 | 0.005                | 1.278              | +        | -       |

| Accession ID | Protein                                              | Gene            | Mol.<br>weight<br>[kDa] | Q-value <sup>a</sup> | Score <sup>b</sup> | Titanium | Ceramic |
|--------------|------------------------------------------------------|-----------------|-------------------------|----------------------|--------------------|----------|---------|
| P01042       | Kininogen-1                                          | <i>KNG1</i>     | 71.957                  | 0                    | 85.087             | +        | +       |
| F5H386       | Lactoperoxidase                                      | <i>LPO</i>      | 73.956                  | 0                    | 323.310            | +        | +       |
| P02788       | Lactotransferrin                                     | <i>LTF</i>      | 78.181                  | 0                    | 323.310            | +        | +       |
| P02545       | Lamin-A/C                                            | <i>LMNA</i>     | 74.139                  | 0                    | 6.349              | +        | +       |
| P30740       | Leukocyte elastase inhibitor                         | <i>SERPINB1</i> | 42.741                  | 0                    | 32.787             | +        | +       |
| P31025       | Lipocalin-1                                          | <i>LCN1</i>     | 19.250                  | 0                    | 179.750            | +        | +       |
| A8MW50       | L-lactate dehydrogenase                              | <i>LDHB</i>     | 25.218                  | 0                    | 16.498             | +        | -       |
| P00338       | L-lactate dehydrogenase A chain                      | <i>LDHA</i>     | 36.688                  | 0                    | 31.699             | +        | +       |
| Q9BZG9       | Ly-6/neurotoxin-like protein 1                       | <i>LYNX1</i>    | 14.026                  | 0                    | 27.554             | +        | -       |
| P61626       | Lysozyme C                                           | <i>LYZ</i>      | 16.537                  | 0                    | 323.310            | +        | +       |
| P14174       | Macrophage migration inhibitory factor               | <i>MIF</i>      | 12.476                  | 0                    | 15.449             | +        | +       |
| P40926       | Malate dehydrogenase                                 | <i>MDH2</i>     | 35.503                  | 0                    | 57.354             | -        | +       |
| P08493       | Matrix Gla protein                                   | <i>MGP</i>      | 12.353                  | 0                    | 63.739             | +        | +       |
| P14780       | Matrix metalloproteinase-9                           | <i>MMP9</i>     | 78.457                  | 0                    | 46.737             | +        | +       |
| P55145       | Mesencephalic astrocyte-derived neurotrophic factor  | <i>MANF</i>     | 20.700                  | 0                    | 21.957             | +        | +       |
| Q5H9A7       | Metalloproteinase inhibitor 1                        | <i>TIMP1</i>    | 16.057                  | 0                    | 124.980            | +        | +       |
| P26038       | Moesin                                               | <i>MSN</i>      | 67.819                  | 0                    | 87.902             | +        | +       |
| D6RFL4       | Monocyte differentiation antigen CD14                | <i>CD14</i>     | 23.313                  | 0.001                | 2.378              | +        | -       |
| Q9HC84       | Mucin-5B                                             | <i>MUC5B</i>    | 596.330                 | 0                    | 323.310            | +        | +       |
| Q8TAX7       | Mucin-7                                              | <i>MUC7</i>     | 39.158                  | 0                    | 67.663             | +        | +       |
| U3KPS2       | Myeloblastin                                         | <i>PRTN3</i>    | 23.611                  | 0                    | 7.119              | +        | +       |
| P05164       | Myeloperoxidase                                      | <i>MPO</i>      | 83.868                  | 0                    | 160.600            | +        | +       |
| F8W1R7       | Myosin light polypeptide 6                           | <i>MYL6</i>     | 16.290                  | 0                    | 23.955             | +        | +       |
| J3QRS3       | Myosin regulatory light chain 12A                    | <i>MYL12A</i>   | 20.457                  | 0                    | 17.315             | +        | -       |
| P35579       | Myosin-9                                             | <i>MYH9</i>     | 226.530                 | 0                    | 164.400            | +        | +       |
| F8W1N5       | Nascent polypeptide-associated complex subunit alpha | <i>NACA</i>     | 7.813                   | 0                    | 43.602             | +        | +       |

| Accession ID | Protein                                             | Gene              | Mol.<br>weight<br>[kDa] | Q-value <sup>a</sup> | Score <sup>b</sup> | Titanium | Ceramic |
|--------------|-----------------------------------------------------|-------------------|-------------------------|----------------------|--------------------|----------|---------|
| Q09666       | Neuroblast differentiation-associated protein AHNAK | <i>AHNAK</i>      | 629.090                 | 0                    | 4.875              | +        | +       |
| P59666       | Neutrophil defensin 3                               | <i>DEFA3</i>      | 10.245                  | 0                    | 39.708             | +        | +       |
| P08246       | Neutrophil elastase                                 | <i>ELANE</i>      | 28.518                  | 0                    | 13.057             | +        | +       |
| X6R8F3       | Neutrophil gelatinase-associated lipocalin          | <i>LCN2</i>       | 22.788                  | 0                    | 104.720            | +        | +       |
| P43490       | Nicotinamide phosphoribosyltransferase              | <i>NAMPT</i>      | 55.520                  | 0                    | 14.930             | +        | +       |
| P10153       | Non-secretory ribonuclease                          | <i>RNASE2</i>     | 18.354                  | 0.002                | 3.685              | +        | +       |
| Q02818       | Nucleobindin-1                                      | <i>NUCB1</i>      | 53.879                  | 0                    | 153.450            | +        | +       |
| V9HW75       | Nucleobindin-2                                      | <i>NUCB2</i>      | 50.222                  | 0                    | 323.310            | +        | +       |
| P19338       | Nucleolin                                           | <i>NCL</i>        | 76.613                  | 0                    | 64.895             | +        | +       |
| P06748       | Nucleophosmin                                       | <i>NPM1</i>       | 32.575                  | 0                    | 186.160            | +        | +       |
| Q32Q12       | Nucleoside diphosphate kinase                       | <i>NME1, NME2</i> | 32.642                  | 0                    | 16.465             | -        | +       |
| Q92882       | Osteoclast-stimulating factor 1                     | <i>OSTF1</i>      | 23.787                  | 0.002                | 4.013              | +        | +       |
| P20962       | Parathyrosin                                        | <i>PTMS</i>       | 11.530                  | 0.001                | 2.112              | +        | +       |
| O75475       | PC4 and SFRS1-interacting protein                   | <i>PSIP1</i>      | 60.103                  | 0.002                | 4.468              | +        | -       |
| P19021       | Peptidyl-glycine alpha-amidating monooxygenase      | <i>PAM</i>        | 108.330                 | 0                    | 22.469             | +        | -       |
| P62937       | Peptidyl-prolyl cis-trans isomerase A               | <i>PPIA</i>       | 18.012                  | 0                    | 164.450            | +        | +       |
| P23284       | Peptidyl-prolyl cis-trans isomerase B               | <i>PPIB</i>       | 23.742                  | 0                    | 210.760            | +        | +       |
| P62942       | Peptidyl-prolyl cis-trans isomerase FKBP1A          | <i>FKBP1A</i>     | 14.926                  | 0                    | 18.777             | +        | -       |
| Q06830       | Peroxiredoxin-1                                     | <i>PRDX1</i>      | 22.110                  | 0                    | 28.721             | +        | +       |
| P32119       | Peroxiredoxin-2                                     | <i>PRDX2</i>      | 21.892                  | 0.001                | 3.052              | +        | -       |
| P30044       | Peroxiredoxin-5                                     | <i>PRDX5</i>      | 22.086                  | 0                    | 33.396             | +        | +       |
| P30041       | Peroxiredoxin-6                                     | <i>PRDX6</i>      | 25.035                  | 0                    | 19.197             | +        | +       |
| P30086       | Phosphatidylethanolamine-binding protein 1          | <i>PEBP1</i>      | 21.057                  | 0                    | 32.645             | +        | +       |
| P00558       | Phosphoglycerate kinase 1                           | <i>PGK1</i>       | 44.614                  | 0                    | 112.890            | +        | +       |
| P18669       | Phosphoglycerate mutase 1                           | <i>PGAM1</i>      | 28.804                  | 0                    | 23.953             | +        | +       |
| P55058       | Phospholipid transfer protein                       | <i>PLTP</i>       | 54.739                  | 0                    | 8.454              | +        | +       |

| Accession ID | Protein                                               | Gene            | Mol. weight [kDa] | Q-value <sup>a</sup> | Score <sup>b</sup> | Titanium | Ceramic |
|--------------|-------------------------------------------------------|-----------------|-------------------|----------------------|--------------------|----------|---------|
| P05155       | Plasma protease C1 inhibitor                          | <i>SERPING1</i> | 55.154            | 0                    | 39.258             | +        | +       |
| P00747       | Plasminogen                                           | <i>PLG</i>      | 90.568            | 0                    | 260.020            | +        | +       |
| Q8NC51       | Plasminogen activator inhibitor 1 RNA-binding protein | <i>SERBP1</i>   | 44.965            | 0                    | 68.499             | +        | +       |
| P13796       | Plastin-2                                             | <i>LCP1</i>     | 70.288            | 0                    | 57.475             | +        | +       |
| H3BRU6       | Poly(rC)-binding protein 2                            | <i>PCBP2</i>    | 31.600            | 0                    | 10.627             | -        | +       |
| P01833       | Polymeric immunoglobulin receptor                     | <i>PIGR</i>     | 83.283            | 0                    | 323.310            | +        | +       |
| J3QS39       | Polyubiquitin-B                                       | <i>UBB</i>      | 10.469            | 0                    | 48.002             | +        | +       |
| H3BPF6       | Prefoldin subunit 5                                   | <i>PFDN5</i>    | 17.047            | 0                    | 10.715             | +        | -       |
| P07737       | Profilin-1                                            | <i>PFN1</i>     | 15.054            | 0                    | 211.460            | +        | +       |
| P12273       | Prolactin-inducible protein                           | <i>PIP</i>      | 16.572            | 0                    | 323.310            | +        | +       |
| P04280       | Proline-rich peptide II-2                             | <i>PRB1</i>     | 38.545            | 0.001                | 2.416              | +        | +       |
| Q6MZM9       | Proline-rich protein 27                               | <i>PRR27</i>    | 22.720            | 0                    | 33.831             | +        | +       |
| Q16378       | Proline-rich protein 4                                | <i>PRR4</i>     | 16.890            | 0                    | 66.158             | +        | +       |
| B1AVU8       | Prosaposin                                            | <i>PSAP</i>     | 61.692            | 0                    | 124.030            | +        | +       |
| Q15185       | Prostaglandin E synthase 3                            | <i>PTGES3</i>   | 19.155            | 0                    | 11.038             | +        | -       |
| Q16651       | Prostasin                                             | <i>PRSS8</i>    | 36.431            | 0                    | 16.339             | +        | -       |
| Q06323       | Proteasome activator complex subunit 1                | <i>PSME1</i>    | 28.723            | 0                    | 6.004              | +        | -       |
| P25787       | Proteasome subunit alpha type-2                       | <i>PSMA2</i>    | 25.898            | 0                    | 26.686             | +        | -       |
| P02760       | Protein AMBP                                          | <i>AMBP</i>     | 38.999            | 0.002                | 4.514              | +        | +       |
| P07237       | Protein disulfide-isomerase                           | <i>P4HB</i>     | 57.116            | 0                    | 228.670            | +        | +       |
| P30101       | Protein disulfide-isomerase A3                        | <i>PDIA3</i>    | 56.782            | 0                    | 32.603             | +        | +       |
| H7BZJ3       | Protein disulfide-isomerase A3                        | <i>PDIA3</i>    | 13.519            | 0.001                | 2.7767             | +        | -       |
| P13667       | Protein disulfide-isomerase A4                        | <i>PDIA4</i>    | 72.932            | 0                    | 13.580             | +        | +       |
| B3EWG6       | Protein FAM25G                                        | <i>FAM25G</i>   | 9.320             | 0                    | 50.200             | +        | +       |
| A0A0A0MS12   | Protein IGHV4-34                                      | <i>IGHV4-34</i> | 13.815            | 0.003                | 1.573              | +        | +       |
| A0A087WZW8   | Protein IGKV3-11                                      | <i>IGKV3-11</i> | 25.600            | 0                    | 323.310            | +        | +       |

| Accession ID | Protein                                         | Gene           | Mol.<br>weight<br>[kDa] | Q-value <sup>a</sup> | Score <sup>b</sup> | Titanium | Ceramic |
|--------------|-------------------------------------------------|----------------|-------------------------|----------------------|--------------------|----------|---------|
| P31949       | Protein S100-A11                                | <i>S100A11</i> | 11.740                  | 0                    | 111.790            | +        | +       |
| P80511       | Protein S100-A12                                | <i>S100A12</i> | 10.575                  | 0                    | 74.065             | +        | +       |
| R4GN49       | Protein S100-A2                                 | <i>S100A2</i>  | 7.3243                  | 0.005                | 1.242              | +        | +       |
| Q5RHS7       | Protein S100-A2                                 | <i>S100A2</i>  | 10.970                  | 0                    | 45.710             | +        | +       |
| P26447       | Protein S100-A4                                 | <i>S100A4</i>  | 11.728                  | 0.002                | 3.251              | -        | +       |
| R4GN98       | Protein S100-A6                                 | <i>S100A6</i>  | 9.681                   | 0                    | 33.337             | +        | +       |
| P05109       | Protein S100-A8                                 | <i>S100A8</i>  | 10.834                  | 0                    | 180.880            | +        | +       |
| P06702       | Protein S100-A9                                 | <i>S100A9</i>  | 13.242                  | 0                    | 323.310            | +        | +       |
| P25815       | Protein S100-P                                  | <i>S100P</i>   | 10.400                  | 0                    | 6.811              | +        | +       |
| Q01105       | Protein SET                                     | <i>SET</i>     | 33.488                  | 0                    | 9.641              | +        | +       |
| Q08188       | Protein-glutamine gamma-glutamyltransferase E   | <i>TGM3</i>    | 76.631                  | 0                    | 156.510            | +        | +       |
| E9PIT3       | Prothrombin                                     | <i>F2</i>      | 65.408                  | 0                    | 183.650            | +        | +       |
| B8ZZQ6       | Prothymosin alpha                               | <i>PTMA</i>    | 11.758                  | 0                    | 36.058             | +        | +       |
| P14618       | Pyruvate kinase PKM                             | <i>PKM</i>     | 57.936                  | 0                    | 282.770            | +        | +       |
| P50395       | Rab GDP dissociation inhibitor alpha            | <i>GDI2</i>    | 50.663                  | 0                    | 22.307             | +        | +       |
| C9JJ34       | Ran-specific GTPase-activating protein          | <i>RANBP1</i>  | 18.762                  | 0                    | 13.345             | +        | -       |
| B1AH78       | Ras-related C3 botulinum toxin substrate 1      | <i>RAC1</i>    | 18.502                  | 0                    | 6.809              | +        | +       |
| P62834       | Ras-related protein Rap-1A                      | <i>RAP1A</i>   | 20.987                  | 0                    | 8.413              | +        | -       |
| Q9HD89       | Resistin                                        | <i>RETN</i>    | 11.419                  | 0.002                | 3.914              | +        | -       |
| P52566       | Rho GDP-dissociation inhibitor 2                | <i>ARHGDI2</i> | 22.988                  | 0                    | 27.021             | +        | +       |
| P34096       | Ribonuclease 4                                  | <i>RNASE4</i>  | 16.840                  | 0                    | 19.847             | +        | +       |
| H0YAE9       | Ribonuclease T2                                 | <i>RNASET2</i> | 21.772                  | 0                    | 6.874              | +        | +       |
| P23921       | Ribonucleoside-diphosphate reductase            | <i>RRM1</i>    | 90.069                  | 0.001                | 2.726              | +        | -       |
| J3QR09       | Ribosomal protein L19                           | <i>RPL19</i>   | 23.134                  | 0.001                | 1.810              | +        | -       |
| B1AKD8       | Rootletin                                       | <i>CROCC</i>   | 149.060                 | 0                    | 10.328             | +        | +       |
| P02810       | Salivary acidic proline-rich phosphoprotein 1/2 | <i>PRH1</i>    | 17.851                  | 0                    | 323.310            | +        | +       |

| Accession ID | Protein                                              | Gene            | Mol.<br>weight<br>[kDa] | Q-value <sup>a</sup> | Score <sup>b</sup> | Titanium | Ceramic |
|--------------|------------------------------------------------------|-----------------|-------------------------|----------------------|--------------------|----------|---------|
| Q8N474       | Secreted frizzled-related protein 1                  | <i>SFRP1</i>    | 35.385                  | 0                    | 9.519              | +        | +       |
| D6REX5       | Selenoprotein P                                      | <i>SEPP1</i>    | 35.116                  | 0                    | 8.370              | -        | +       |
| Q9NQ38       | Serine protease inhibitor Kazal-type 5               | <i>SPINK5</i>   | 120.71                  | 0                    | 79.004             | +        | +       |
| E5RFX6       | Serine protease inhibitor Kazal-type 7               | <i>SPINK7</i>   | 6.563                   | 0                    | 5.342              | -        | +       |
| Q9BRF8       | Serine/threonine-protein phosphatase CPPED1          | <i>CPPED1</i>   | 35.548                  | 0.002                | 4.828              | +        | -       |
| P02787       | Serotransferrin                                      | <i>TF</i>       | 77.063                  | 0                    | 323.310            | +        | +       |
| E9PQD6       | Serum amyloid A-1 protein                            | <i>SAA1</i>     | 13.546                  | 0                    | 37.744             | +        | +       |
| P02743       | Serum amyloid P-component                            | <i>APCS</i>     | 25.387                  | 0                    | 8.186              | +        | -       |
| Q5T123       | SH3 domain-binding glutamic acid-rich-like protein 3 | <i>SH3BGRL3</i> | 9.3804                  | 0                    | 8.192              | +        | +       |
| P35326       | Small proline-rich protein 2A                        | <i>SPRR2A</i>   | 7.9653                  | 0                    | 59.969             | +        | +       |
| P35325       | Small proline-rich protein 2B                        | <i>SPRR2B</i>   | 7.9754                  | 0                    | 10.242             | +        | +       |
| P22532       | Small proline-rich protein 2D                        | <i>SPRR2D</i>   | 7.9053                  | 0.001                | 2.362              | -        | +       |
| Q9UBC9       | Small proline-rich protein 3                         | <i>SPRR3</i>    | 18.154                  | 0                    | 323.310            | +        | +       |
| Q14515       | SPARC-like protein 1                                 | <i>SPARCL1</i>  | 75.207                  | 0                    | 323.310            | +        | +       |
| Q13813       | Spectrin alpha chain, non-erythrocytic 1             | <i>SPTAN1</i>   | 284.540                 | 0                    | 11.794             | +        | +       |
| P02808       | Statherin                                            | <i>STATH</i>    | 7.304                   | 0                    | 49.528             | +        | +       |
| P02814       | Submaxillary gland androgen-regulated protein 3B     | <i>SMR3B</i>    | 8.188                   | 0                    | 47.530             | +        | +       |
| O00391       | Sulfhydryl oxidase 1                                 | <i>QSOX1</i>    | 82.577                  | 0                    | 312.290            | +        | +       |
| Q6UWP8       | Suprabasin                                           | <i>SBSN</i>     | 60.540                  | 0                    | 323.310            | +        | +       |
| Q9Y490       | Talin-1                                              | <i>TLN1</i>     | 269.760                 | 0.002                | 3.910              | +        | -       |
| F8VQ14       | T-complex protein 1 subunit beta                     | <i>CCT2</i>     | 44.812                  | 0                    | 28.991             | +        | -       |
| Q99832       | T-complex protein 1 subunit eta                      | <i>CCT7</i>     | 59.366                  | 0                    | 23.158             | +        | -       |
| P40227       | T-complex protein 1 subunit zeta                     | <i>CCT6A</i>    | 58.024                  | 0                    | 6.940              | +        | +       |
| E9PHK0       | Tetranectin                                          | <i>CLEC3B</i>   | 17.794                  | 0                    | 31.212             | +        | +       |
| H7BXY6       | Tetraspanin-14                                       | <i>TSPAN14</i>  | 23.918                  | 0.001                | 1.892              | +        | -       |
| P10599       | Thioredoxin                                          | <i>TXN</i>      | 11.737                  | 0                    | 68.640             | +        | +       |

| Accession ID | Protein                                                    | Gene           | Mol. weight [kDa] | Q-value <sup>a</sup> | Score <sup>b</sup> | Titanium | Ceramic |
|--------------|------------------------------------------------------------|----------------|-------------------|----------------------|--------------------|----------|---------|
| Q9BRA2       | Thioredoxin domain-containing protein 17                   | <i>TXNDC17</i> | 13.941            | 0                    | 7.509              | +        | -       |
| E9PB61       | THO complex subunit 4                                      | <i>ALYREF</i>  | 27.557            | 0                    | 18.031             | +        | -       |
| C9JGI3       | Thymidine phosphorylase                                    | <i>TYMP</i>    | 46.087            | 0.002                | 3.263              | +        | -       |
| P63313       | Thymosin beta-10                                           | <i>TMSB10</i>  | 5.026             | 0                    | 15.236             | +        | +       |
| P62328       | Thymosin beta-4                                            | <i>TMSB4X</i>  | 5.053             | 0                    | 125.270            | +        | +       |
| P37837       | Transaldolase                                              | <i>TALDO1</i>  | 37.540            | 0                    | 9.361              | +        | +       |
| P20061       | Transcobalamin-1                                           | <i>TCN1</i>    | 48.206            | 0                    | 222.500            | +        | +       |
| X6RJP6       | Transgelin-2                                               | <i>TAGLN2</i>  | 21.086            | 0                    | 109.420            | +        | +       |
| P55072       | Transitional endoplasmic reticulum ATPase                  | <i>VCP</i>     | 89.321            | 0                    | 34.183             | +        | +       |
| P29401       | Transketolase                                              | <i>TKT</i>     | 67.877            | 0                    | 108.970            | +        | +       |
| J3KPG2       | Translationally-controlled tumor protein                   | <i>TPT1</i>    | 18.108            | 0.003                | 1.713              | +        | -       |
| P02766       | Transthyretin                                              | <i>TTR</i>     | 15.887            | 0                    | 79.078             | +        | +       |
| Q07654       | Trefoil factor 3                                           | <i>TFF3</i>    | 10.181            | 0                    | 15.845             | +        | +       |
| P60174       | Triosephosphate isomerase                                  | <i>TPI1</i>    | 30.791            | 0                    | 76.548             | +        | +       |
| P68363       | Tubulin alpha-1B chain                                     | <i>TUBA1B</i>  | 50.151            | 0                    | 161.450            | +        | +       |
| Q5JP53       | Tubulin beta chain                                         | <i>TUBB</i>    | 47.766            | 0                    | 285.590            | +        | -       |
| Q9BW30       | Tubulin polymerization-promoting protein family member 3   | <i>TPPP3</i>   | 18.985            | 0                    | 14.834             | +        | +       |
| E5RIW3       | Tubulin-specific chaperone A                               | <i>TBCA</i>    | 10.080            | 0                    | 41.274             | +        | +       |
| P68036       | Ubiquitin-conjugating enzyme E2 L3                         | <i>UBE2L3</i>  | 17.861            | 0                    | 7.170              | +        | +       |
| Q6P5S2       | UPF0762 protein C6orf58                                    | <i>C6orf58</i> | 37.926            | 0                    | 323.310            | +        | +       |
| P08670       | Vimentin                                                   | <i>VIM</i>     | 53.651            | 0                    | 323.310            | +        | +       |
| D6RF35       | Vitamin D-binding protein                                  | <i>GC</i>      | 53.020            | 0                    | 158.070            | +        | +       |
| P04004       | Vitronectin                                                | <i>VTN</i>     | 54.305            | 0                    | 105.290            | +        | +       |
| Q86VR7       | V-set and immunoglobulin domain-containing protein 10-like | <i>VSIG10L</i> | 91.624            | 0.002                | 3.246              | +        | +       |
| Q14508       | WAP four-disulfide core domain protein 2                   | <i>WFDC2</i>   | 12.993            | 0                    | 43.544             | +        | +       |
| 25311        | Zinc-alpha-2-glycoprotein                                  | <i>AZGP1</i>   | 34.258            | 0                    | 231.860            | +        | +       |

| Accession ID | Protein                              | Gene  | Mol. weight [kDa] | Q-value <sup>a</sup> | Score <sup>b</sup> | Titanium | Ceramic |
|--------------|--------------------------------------|-------|-------------------|----------------------|--------------------|----------|---------|
| Q96DA0       | Zymogen granule protein 16 homolog B | ZG16B | 22.739            | 0                    | 323.310            | +        | +       |

+: detected; -: not detectable.

<sup>a</sup>Minimum false discovery rate generated by MaxQuant

<sup>b</sup>Andromeda scores generated by MaxQuant
